# Supplementary material for: Efficient water splitting over a hybrid photocatalyst with (002) active facets and heterostructure
Source: Royal Society of Chemistry journal article supplement (doi:10.1039/d2cc02445d), 2022-01-01
Supplement: d2cc02445d1.pdf [file d2cc02445d1.pdf]

## Supplementary Material

### Efficient water splitting over a hybrid photocatalyst with (002) active facet and heterostructure

Yinjuan Dong<sup>a,#</sup>, Mengxue Chen<sup>a,#</sup>, Xiaohu Li<sup>a</sup>, Yu Feng<sup>a</sup>, Bonan Li<sup>a</sup>, Pengfei Feng<sup>a</sup>, Congzhao Dong<sup>a</sup>, Yong Ding<sup>a,b,\*</sup>

<sup>a</sup>State Key Laboratory of Applied Organic Chemistry, Key Laboratory of Advanced Catalysis of Gansu Province, College of Chemistry and Chemical Engineering, Lanzhou University, Lanzhou 730000, China

<sup>b</sup>State Key Laboratory for Oxo Synthesis and Selective Oxidation, Lanzhou Institute of Chemical Physics, Chinese Academy of Sciences, Lanzhou, 730000, China

---

\*Corresponding author. #These authors contributed equally to this work.

E-mail addresses: dingyong1@lzu.edu.cn (Y. Ding)

## Table of content

**1 Experiment**

**2 Relative calculations**

**3 Figures**

## 1 Experiment

### 1.1 Equipment and apparatus

All chemicals were analytical, purchased from commercial sources and were utilized without any further purification. Pure water (18.2 MΩ cm, TOC < 3 ppb) was produced by Molecular Lab Water Purifier. IR spectra (2–4 wt% samples in KBr pellets) were recorded on a Bruker VERTEX 70v FT-IR spectrometer. Powder X-ray diffractions (XRD) were recorded on PANalytical X'Pert Pro Diffractometer using Cu–K radiation as the X-ray source. Elemental analyses of the catalysts were performed on a TJA ICP-atomic emission spectrometer (ICP-AES, IRIS Advantage ER/S). Photoluminescence (PL) spectra were performed on FLS920 fluorescence spectrometer (Edinburgh Instruments). X-Ray photoelectron spectra (XPS) were measured by ESCALAB250xi with X-ray monochromatisation, in which the binding energy was calibrated using peak C 1s at 284.8 eV. UV-vis absorption spectra were registered in a TU-1810 spectrophotometer (Beijing Purkinje General Instrument Co., Ltd.) equipped with a photomultiplier tube detector. Diffuse reflectance spectra were measured using a PerkinElmer Lambda 950 UV-vis diffuse reflectance spectrophotometer. The surface morphology of the samples was characterized by a field emission scanning electron microscope (SEM, Carl Zeiss Ultra Plus, Germany) and transmission electron microscopy (TEM, FEI Tecnai G<sup>2</sup>TF20, America). The H<sub>2</sub> amount was detected by gas chromatography (GC) analysis.

### 1.2 Synthesis of six transition metal mono-substituted polyoxometalates

[Ni(H<sub>2</sub>O)SiW<sub>11</sub>O<sub>39</sub>]<sup>6-</sup> (SiW<sub>11</sub>Ni), [SiW<sub>11</sub>Mn(H<sub>2</sub>O)O<sub>39</sub>]<sup>5-</sup> (SiW<sub>11</sub>Mn), [SiW<sub>11</sub>Co(H<sub>2</sub>O)O<sub>39</sub>]<sup>6-</sup> (SiW<sub>11</sub>Co), [SiW<sub>11</sub>ZnH<sub>2</sub>O<sub>40</sub>]<sup>6-</sup> (SiW<sub>11</sub>Zn), [SiW<sub>11</sub>Fe(H<sub>2</sub>O)O<sub>39</sub>]<sup>5-</sup> (SiW<sub>11</sub>Fe) and [Cu(H<sub>2</sub>O)SiW<sub>11</sub>O<sub>39</sub>]<sup>6-</sup> (SiW<sub>11</sub>Cu) polyoxometalates were prepared according to the method proposed in the previous literature<sup>1</sup>.

### 1.3 Synthesis of CdS/NiW

CdS/NiW was prepared by one-step hydrothermal reaction. 5 g of Cd(NO<sub>3</sub>)<sub>2</sub>·4H<sub>2</sub>O, 3.7 g of CS(NH<sub>2</sub>)<sub>2</sub> and different SiW<sub>11</sub>Ni amount (0, 0.05, 0.1, 0.5, 0.75 mmol) were

dissolved in 60 mL ethylenediamine. After stirring for 1 h, the mixture was transferred into a 100 mL Teflon-lined stainless steel autoclave and hydrothermally treated at 180 °C for 24 h. Cool to room temperature; the precipitates were collected by centrifugation and washed thoroughly with deionized water. The material used for photocatalytic test is the 0.5-CdS/NiW sample (CdS/NiW for clarity) unless otherwise stated. Other CdS/MW composites were synthesized by adding 0.5 mM of  $\text{SiW}_{11}\text{M}$  polyoxometalates (M = Mn, Co, Zn, Fe, Cu).

#### 1.4 Synthesis of P-CdS@P-NiWO<sub>x</sub>

P-CdS@P-NiWO<sub>x</sub> was prepared via a pyrolysis-phosphidation method. 60 mg of CdS/NiW and different  $\text{NaH}_2\text{PO}_2$  amount (180, 300, 420, 540 mg) were ground about 30 minutes to form a uniform distribution and placed into a quartz boat of the tube furnace. Subsequently, the samples were maintained at 300 °C for 2 h with a heating rate of 2 °C·min<sup>-1</sup> in a flowing Ar atmosphere. After cooling to room temperature, the obtained P-CdS was washed with deionized water and ethanol three times and dried in a 60 °C oven for overnight. The obtained samples were denoted as P-CdS@P-NiWO<sub>x</sub>-1:3, P-CdS@P-NiWO<sub>x</sub>-1:5, P-CdS@P-NiWO<sub>x</sub>-1:7 and P-CdS@P-NiWO<sub>x</sub>-1:9, respectively. And the suffixes indicate the phosphating ratios is the feeding mass ratios between CdS/NiW and  $\text{NaH}_2\text{PO}_2 \cdot \text{H}_2\text{O}$ . Typically, the material used for characterizations and photocatalytic tests were the P-CdS@P-NiWO<sub>x</sub>-1:7 sample (P-CdS@P-NiWO<sub>x</sub> for clarity) unless otherwise stated. Preparation of other P-CdS@P-MWO<sub>x</sub> is exactly the same as that for P-CdS except that CdS/MW (M = Mn, Co, Zn, Fe, Cu) composites were used instead of CdS.

#### 1.5 Photocatalytic water splitting test

To test the photocatalytic H<sub>2</sub> evolution of the as-prepared samples, 80 mg of catalyst was dispersed in 30 mL ultrapure water without using any sacrificial reagents or noble metals, or other additives under LED irradiation (Beijing Perfectlight, PLS-LED100B, 100 mW cm<sup>-2</sup>,  $\lambda = 420$  nm). The reaction system was vacuumed with Ar gas for 50 min to remove any residual air in solution. To

determine the amount of H<sub>2</sub> evolution, 50 μL of the evolved gas was collected and analyzed by a gas chromatograph (GC).

## 1.6 EPR measurement

Electron paramagnetic resonance (EPR) spectroscopy was used to detect  $\cdot\text{O}_2^-$  radicals. 10 mg of P-CdS@P-MWO<sub>x</sub> was dissolved in 2.5 mL of EtOH/water (v/v=9/1) mixture solution, then 0.1 mmol of 5, 5-dimethyl-1-pyrroline N-oxide (DMPO) was added. Under LED light irradiation, the  $\cdot\text{O}_2^-$  radicals were captured by DMPO.

## 1.7 Detection of H<sub>2</sub>O<sub>2</sub>

An iodometric method was used to assess the H<sub>2</sub>O<sub>2</sub> evolution on UV-vis absorption spectrum. To prepare the standard solution for H<sub>2</sub>O<sub>2</sub> detection, 809.7 mg of potassium iodide and 15.1 mg of ammonium molybdate tetrahydrate were added into 50 mL ultrapure water under continuous stirring. Afterward, 50 μL of standard solution was added into 5 mL of collected filtrate after irradiating 3 h.

## 1.8 Photoelectrochemical measurement

The photoelectrochemical measurements were investigated on a CHI 760D workstation (CH Instruments Co.) with a three-electrode setup under simulated solar light irradiation (AM 1.5G filter, 100 mW cm<sup>-2</sup>, 300 W Xe lamp, Perfect Light). The fabricated photoanode, Pt plate and Ag/AgCl electrode (3.5 M KCl) were conducted as working electrode, counter electrode and reference electrode, respectively. Deionized water was used as the electrolyte and bubbled with Ar gas about 30 min for all photoelectrochemical tests. All measured potentials were converted to V vs. normal hydrogen electrode (NHE) ( $E_{\text{NHE}} = E_{\text{Ag/AgCl}} + E^{\theta}_{\text{Ag/AgCl}}$ ;  $E^{\theta}_{\text{Ag/AgCl}} = 0.1976 \text{ V}$ ).

## 2. Relative calculations

### 2.1 Determination of electron transfer number

The electron transfer number was determined via a rotating ring-disk electrodes (RRDE) testing system (RRDE-3A, ALS Co. Ltd). RRDE experiments were performed in Ar saturated 0.1 M KPi buffer (pH 7) (rotating speed: 1600 rpm; scan rate: 10 mV·s<sup>-1</sup>).

A CHI 760D workstation (CH Instruments Co.) was implemented to record the data. The RRDE consists of a glassy carbon disk ( $r_1 = 4$  mm), an insulator ring ( $r_2 = 5$  mm), and a glassy carbon ring ( $r_3 = 7$  mm).

The number of transferred electron ( $n$ ),  $H_2O_2$  yield and Faradaic efficiency are calculated according to the following equations (1–3)<sup>2-4</sup>:

$$n = 4I_{\text{disk}} / (I_{\text{disk}} + I_{\text{ring}} / N) \quad (1)$$

$$H_2O_2 \text{ yeild (\%)} = 2I_{\text{ring}} / (N * I_{\text{disk}} + I_{\text{ring}}) \quad (2)$$

$$\text{Faradaic efficiency of } H_2O_2 \text{ (\%)} = 100 \times (i_r / N) / i_d \quad (3)$$

Where,  $I_{\text{disk}}$  and  $I_{\text{ring}}$  represent the disk and ring currents, respectively.  $N$  is the RRDE collection efficiency determined to be 0.353.

For preparing RRDE measurements, 1 mg of P-CdS@P-MWO<sub>x</sub> sample and 20  $\mu$ L of 0.5% Nafion (DuPont) were uniformly dispersed in 1 mL of water/ethanol ( $v/v=1/1$ ) mixture solution. Subsequently, the mixture was treated under ultrasonication for 1 h to get the homogeneous suspension. Whereafter, 10  $\mu$ L of suspension was drop-cast onto the disk electrode. Pt plate and Ag/AgCl electrode (3.5 M KCl) were used as counter and reference electrodes, respectively. 0.1 M KPi buffer (pH 7) was employed as the electrolyte after saturation with Ar gas for 30 min.

## 2.2 Quantum yield calculation for P-CdS@P-MWO<sub>x</sub> system (reaction time is 3 h)

The quantum yield ( $\Phi_{\text{QY}}$ ) was measured for the photocatalytic water splitting under the following conditions: a quartz flask containing 30 mL pure water with 80 mg P-CdS@P-MWO<sub>x</sub> was irradiated by a LED lamp ( $100 \text{ mW cm}^{-2}$ ;  $\lambda = 420 \text{ nm}$ ). The photon flux of the incident light was determined using a Ray virtual radiation actinometer (FU 100, silicon ray detector, light spectrum, 420 nm; sensitivity, 10–50  $\mu\text{V mmol}^{-1} \text{ m}^{-2} \text{ s}^{-1}$ ), affording a value of  $88 \mu\text{mol m}^{-2} \text{ s}^{-1}$ .

$$H_2 \text{ formation rate} = 0.00929 \mu\text{mol s}^{-1}$$

$$\text{Irradiation radius} = 1.5 \text{ cm} = 0.015 \text{ m}$$

$$\text{Photon flux} = \pi \times (0.015 \text{ m})^2 \times 88 \mu\text{mol m}^{-2} \text{ s}^{-1} = 0.0622 \mu\text{mol s}^{-1}$$

$$\Phi_{QY}(\%, \text{quantum yield}) = \frac{2 \times H_2 \text{ evolution rate}}{\text{photo flux}} \times 100\%$$

$$= \frac{2 \times 0.00929}{0.06220} \times 100\% = 29.9\%$$

### 3. Figures

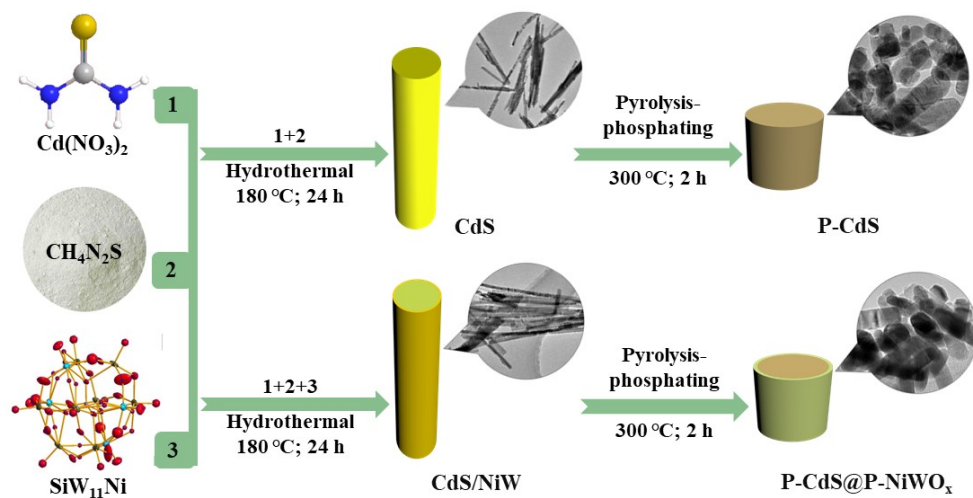

**Scheme S1** Schematic illustration for the formation process of CdS, P-CdS, CdS/NiW and P-CdS@P-NiWO<sub>x</sub> photocatalyst.

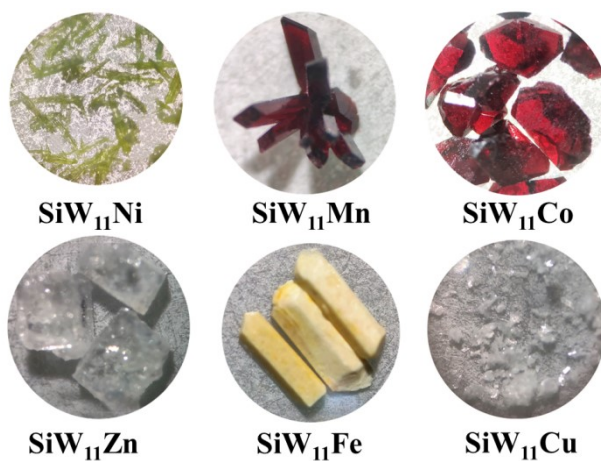

**Fig. S1** Digital photos of  $\text{SiW}_{11}\text{Ni}$ ,  $\text{SiW}_{11}\text{Mn}$ ,  $\text{SiW}_{11}\text{Co}$ ,  $\text{SiW}_{11}\text{Zn}$ ,  $\text{SiW}_{11}\text{Fe}$  and  $\text{SiW}_{11}\text{Cu}$  under the electron microscope.



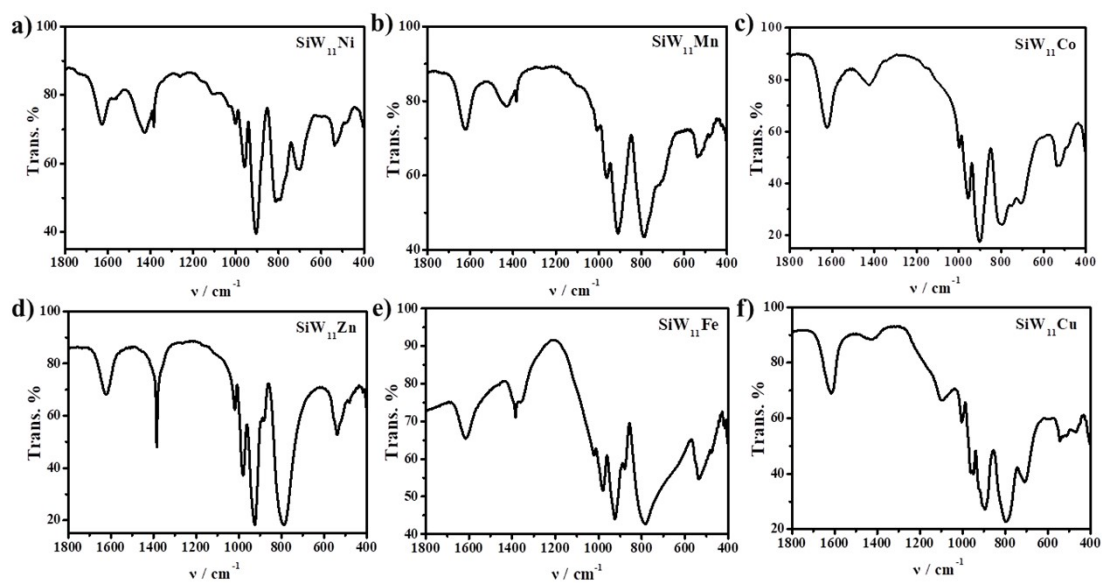

**Fig. S2** FT-IR spectra of (a)  $\text{SiW}_{11}\text{Ni}$ , (b)  $\text{SiW}_{11}\text{Mn}$ , (c)  $\text{SiW}_{11}\text{Co}$ , (d)  $\text{SiW}_{11}\text{Zn}$ , (e)  $\text{SiW}_{11}\text{Fe}$  and (f)  $\text{SiW}_{11}\text{Cu}$ .

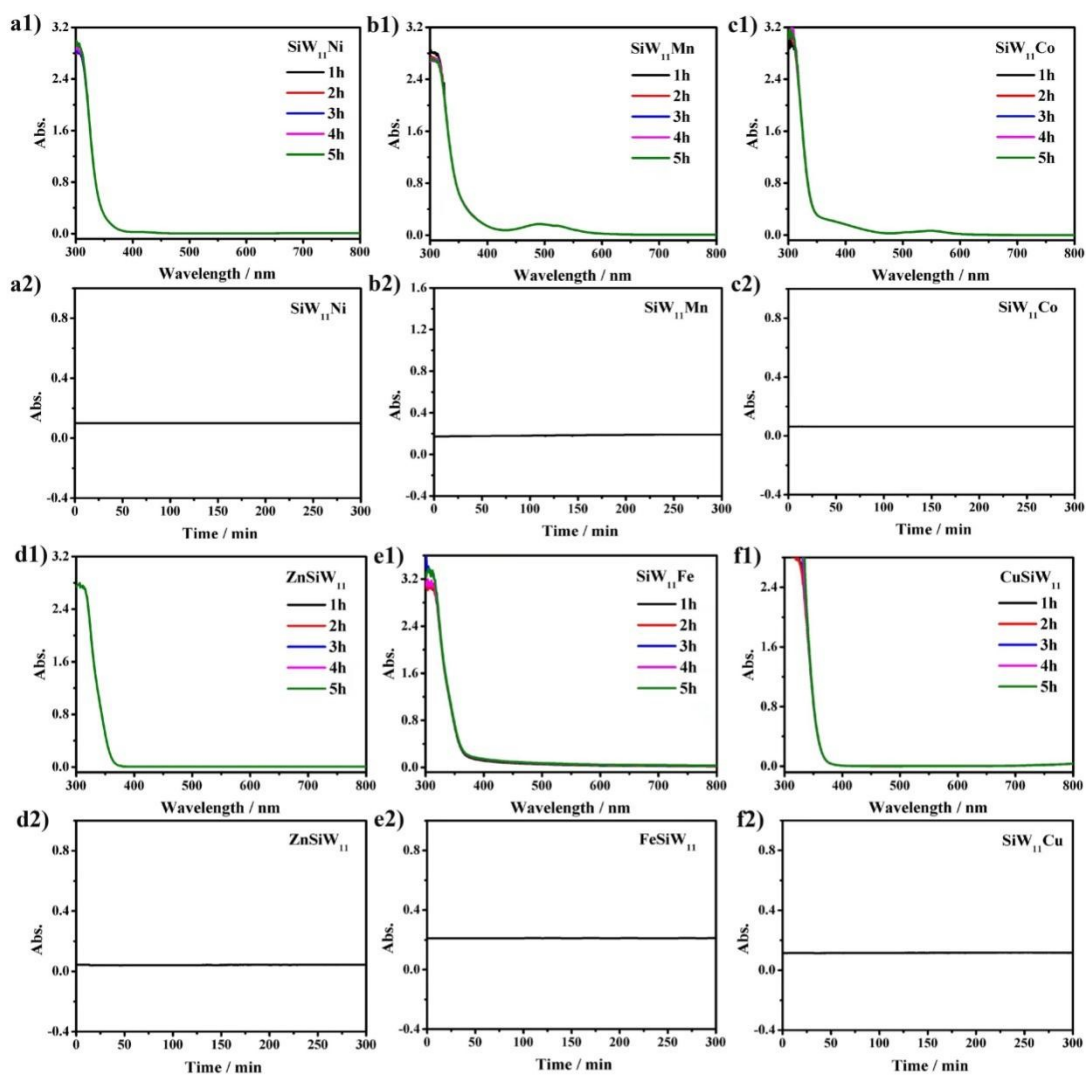

**Fig. S3** Time-dependent UV-vis absorption spectra and time profile of UV-vis spectra in pure water over 5 h period with 1 mM different transition metal mono-substituted silicotungstate polyoxometalates: (a1, a2)  $\text{SiW}_{11}\text{Ni}$ , (b1, b2)  $\text{SiW}_{11}\text{Mn}$ , (c1, c2)  $\text{SiW}_{11}\text{Co}$ , (d1, d2)  $\text{SiW}_{11}\text{Zn}$ , (e1, e2)  $\text{SiW}_{11}\text{Fe}$  and (f1, f2)  $\text{SiW}_{11}\text{Cu}$ .

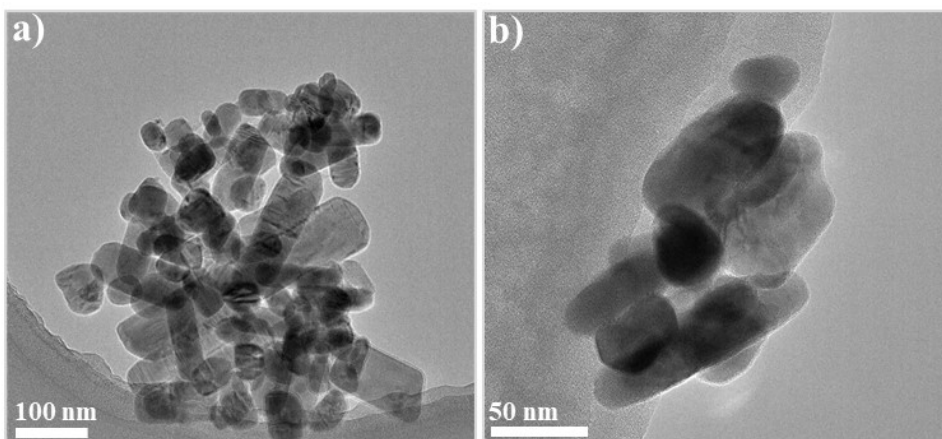

**Fig. S4** (a, b) TEM images of pristine P-CdS.

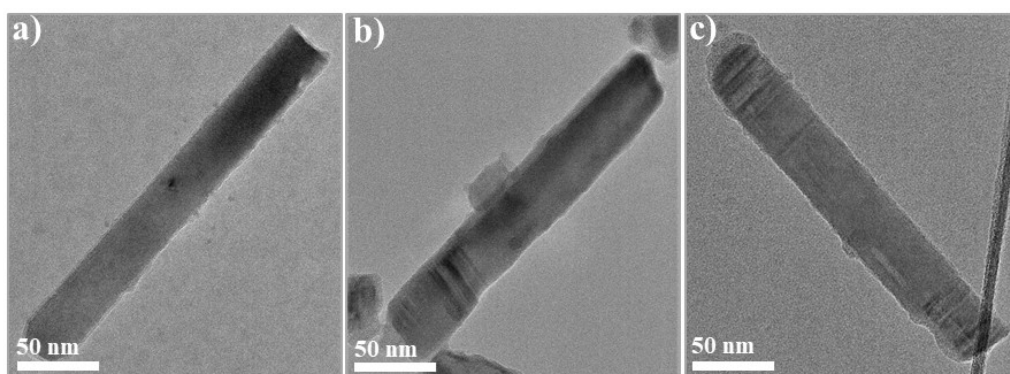

**Fig. S5** TEM images of P-CdS@P-NiWO<sub>x</sub> prepared at different phosphating ratios with NaH<sub>2</sub>PO<sub>2</sub>·H<sub>2</sub>O as phosphorus source. The phosphating ratios is the feeding mass ratios between CdS/NiW and NaH<sub>2</sub>PO<sub>2</sub>·H<sub>2</sub>O. (a) P-CdS@P-NiWO<sub>x</sub>-1:3; (b) P-CdS@P-NiWO<sub>x</sub>-1:5; (c) P-CdS@P-NiWO<sub>x</sub>-1:9.

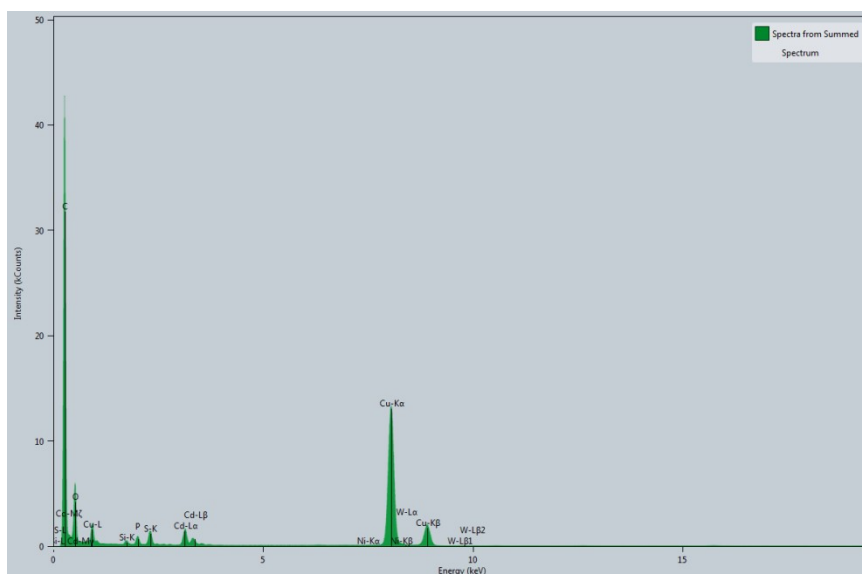

**Fig. S6** The EDS spectrum of P-CdS@P-NiWO<sub>x</sub>.

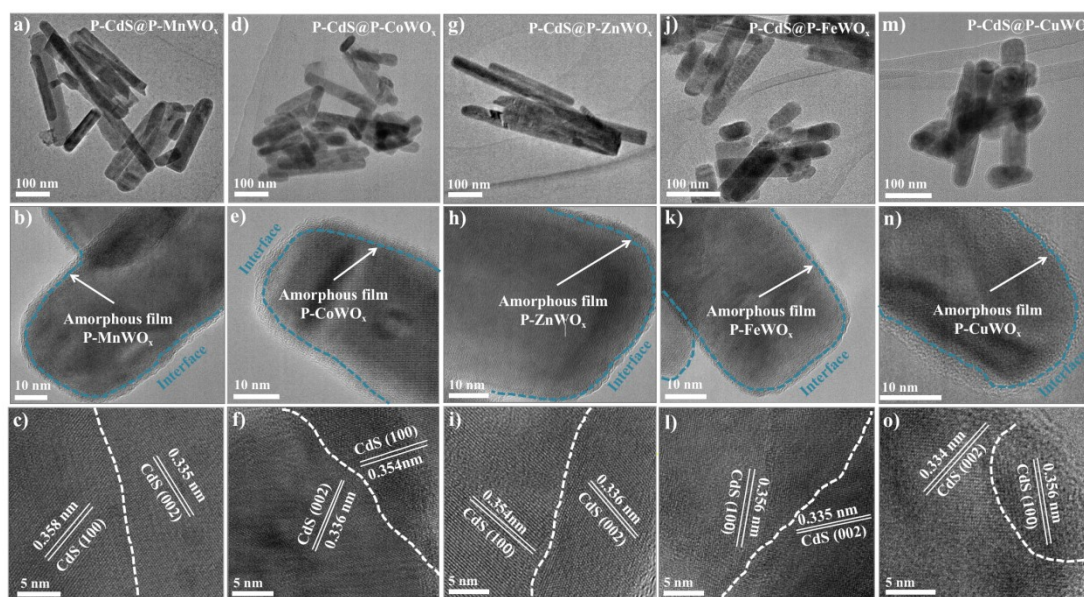

**Fig. S7** Structural characterization of P-CdS@P-MWO<sub>x</sub> derived from other transition metal SiW<sub>11</sub>M polyoxometalates. (a) TEM and (b-c) HRTEM images of P-CdS@P-MnWO<sub>x</sub>, (d) TEM and (e-f) HRTEM images of P-CdS@P-CoWO<sub>x</sub>, (g) TEM and (h-i) HRTEM images of P-CdS@P-ZnWO<sub>x</sub>. (j) TEM and (k-l) HRTEM images of P-CdS@P-FeWO<sub>x</sub>. (m) TEM and (n-o) HRTEM images of P-CdS@P-CuWO<sub>x</sub>.

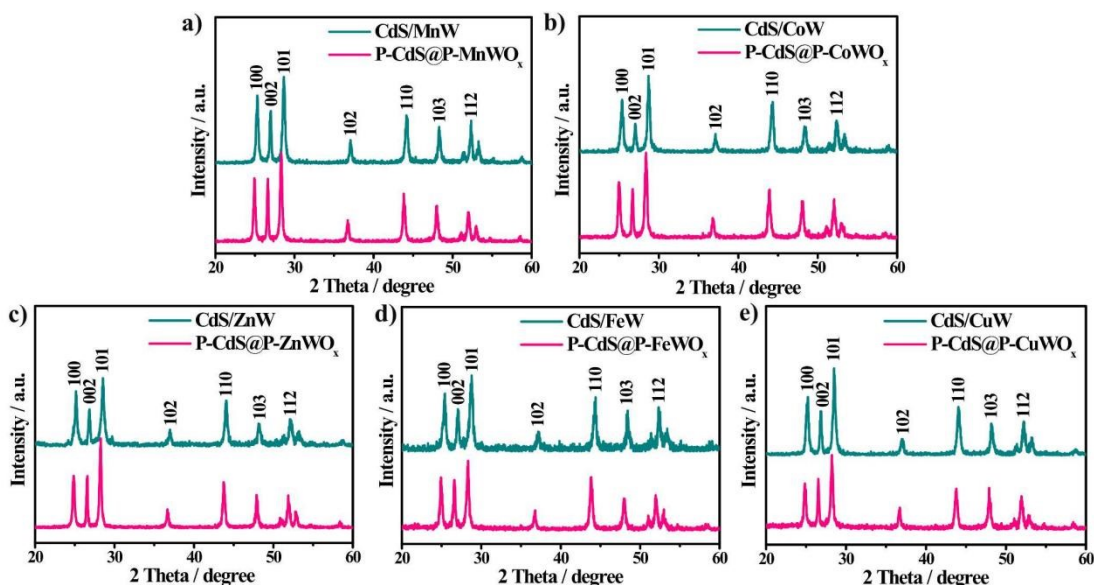

**Fig. S8** The powder XRD spectra of P-CdS@P-MWO<sub>x</sub> by using other different transition metal SiW<sub>11</sub>M polyoxometalates: (b) P-CdS@P-MnWO<sub>x</sub>, (c) P-CdS@P-CoWO<sub>x</sub>, (d) P-CdS@P-ZnWO<sub>x</sub>, (e) P-CdS@P-FeWO<sub>x</sub> and (f) P-CdS@P-CuWO<sub>x</sub>.

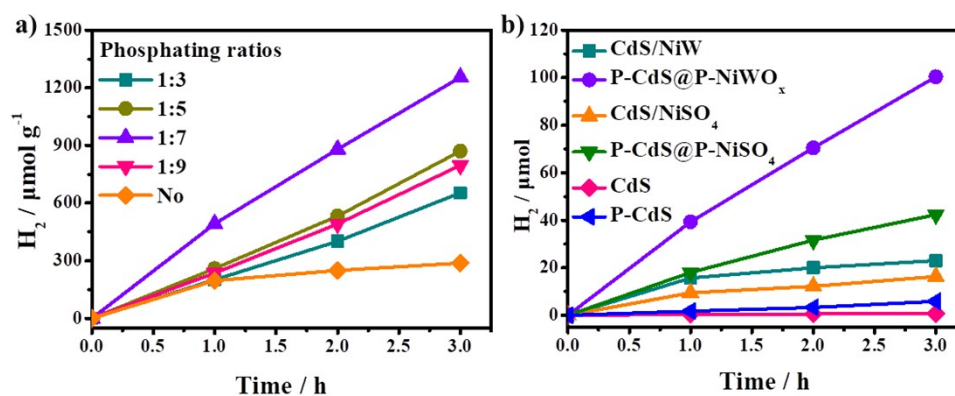

**Fig. S9** (a) Photocatalytic H<sub>2</sub> evolution activity of P-CdS@P-NiWO<sub>x</sub> prepared at different phosphating ratios with NaH<sub>2</sub>PO<sub>2</sub>·H<sub>2</sub>O as phosphorus source. The phosphating ratios is the feeding mass ratios between CdS/NiW and NaH<sub>2</sub>PO<sub>2</sub>·H<sub>2</sub>O. (b) A comparison of the time course of photocatalytic H<sub>2</sub> evolution over CdS, P-CdS, CdS/NiW, P-CdS@P-NiWO<sub>x</sub>, CdS/NiSO<sub>4</sub> and P-CdS@P-NiSO<sub>4</sub>.

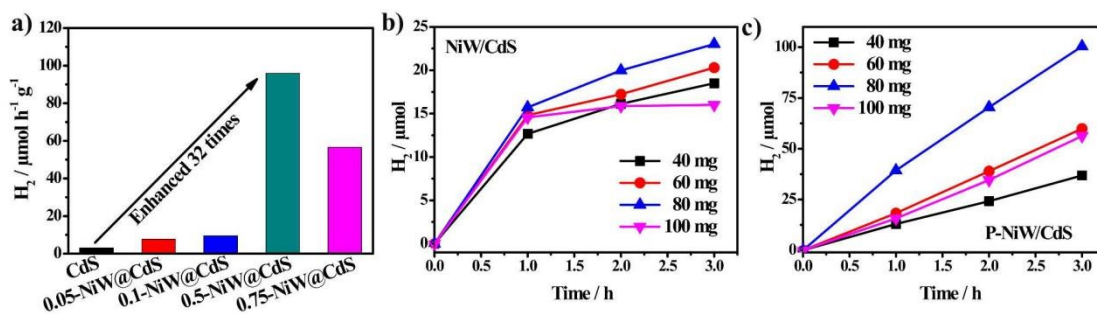

**Fig. S10** Photocatalytic H<sub>2</sub> evolution of P-CdS@P-NiWO<sub>x</sub> and the reference samples in pure water with 420 nm LED lamp. (a) H<sub>2</sub> evolution activity of x-CdS/NiW. The numerical prefix indicates the theoretical molarity of SiW<sub>11</sub>Ni polyoxometalates added in the preparation CdS/NiW composite. (b) H<sub>2</sub> evolution activity using different mass CdS/NiW hybrid material. (c) H<sub>2</sub> evolution activity using different mass P-CdS@P-NiWO<sub>x</sub> composite.

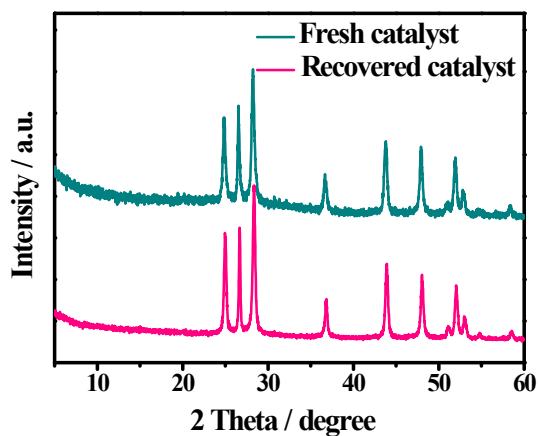

**Fig. S11** XRD patterns of fresh and recovered P-CdS@P-NiWO<sub>x</sub>.

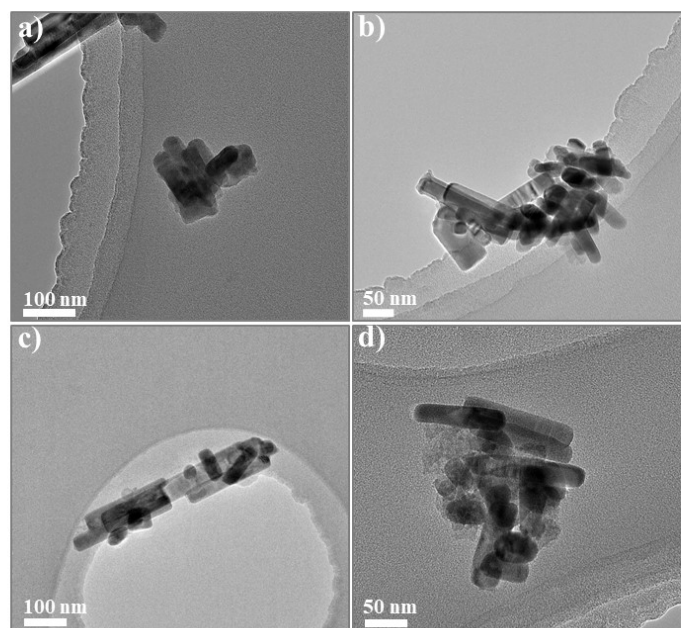

**Fig. S12** TEM images of (a, b) fresh and (c, d) recovered P-CdS@P-NiWO<sub>x</sub>.

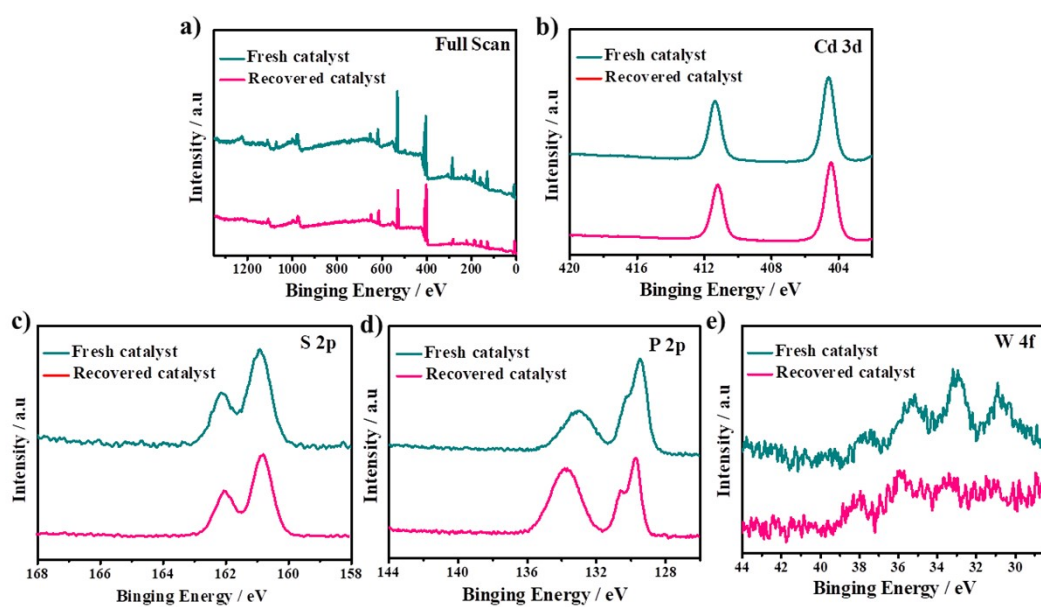

**Fig. S13** XPS spectra of fresh and recovered P-CdS@P-NiWO<sub>x</sub> in the energy regions of (a) full scan, (b) Cd 3d, (c) S 2p, (d) P 2p and (e) W 4f.

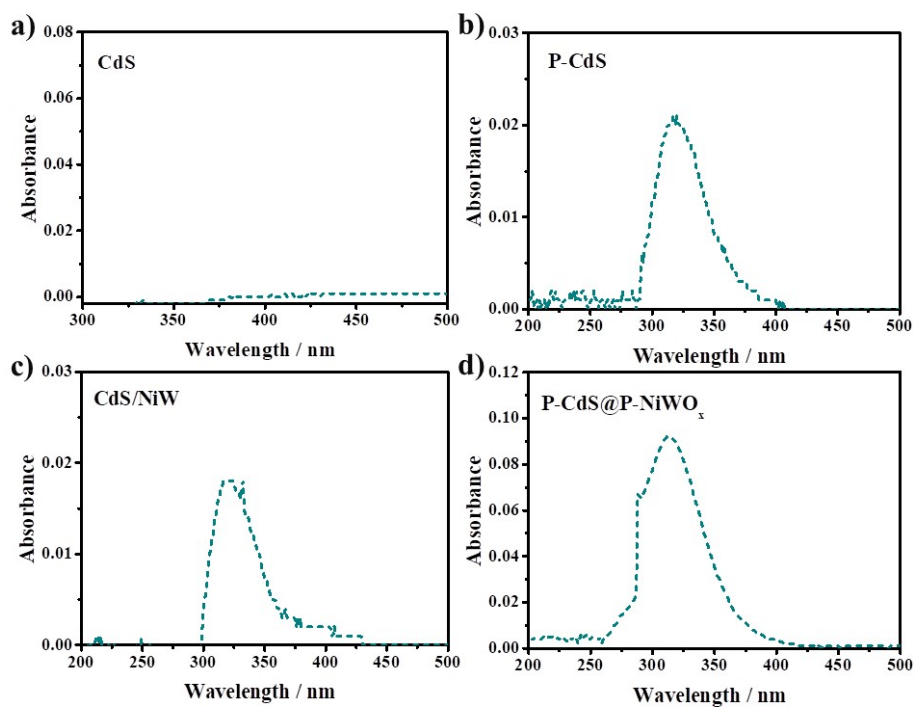

**Fig. S14** UV-vis absorption spectrum for (a) CdS, (b) P-CdS, (c) CdS/NiW, and (d) P-CdS@P-NiWO<sub>x</sub> after 3 h light irradiation under N<sub>2</sub> saturated atmosphere and centrifugation by adding potassium iodide solution and ammonium molybdate tetrahydrate solution.

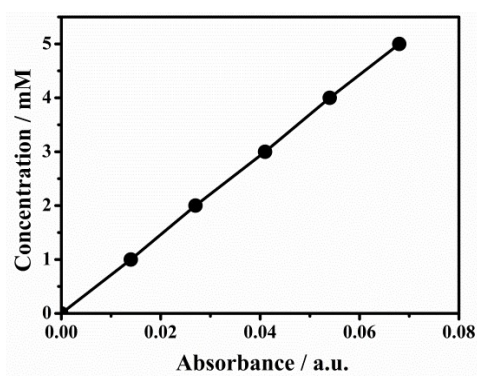

**Fig. S15** Standard curve of H<sub>2</sub>O<sub>2</sub>.



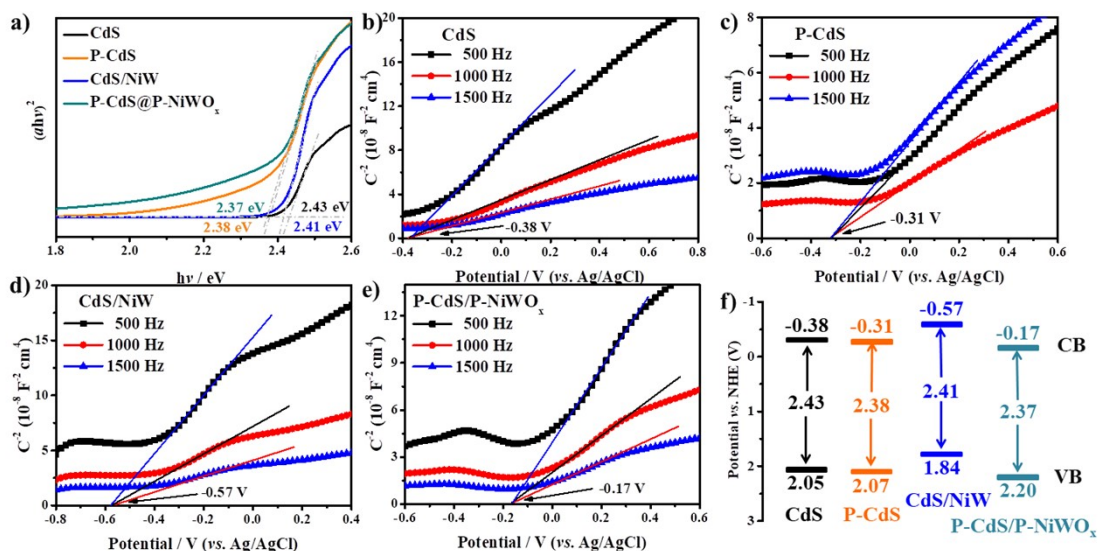

**Fig. S16** (a) Corresponding Tauc plots using Kubelka–Munk parameter as a function versus the photon energy. Mott-Schottky plots of (b) CdS; (c) P-CdS; (d) CdS/NiW and (e) P-CdS@P-NiWO<sub>x</sub>. (f) Schematic illustration of band structures for CdS, P-CdS, CdS/NiW and P-CdS@P-NiWO<sub>x</sub>.

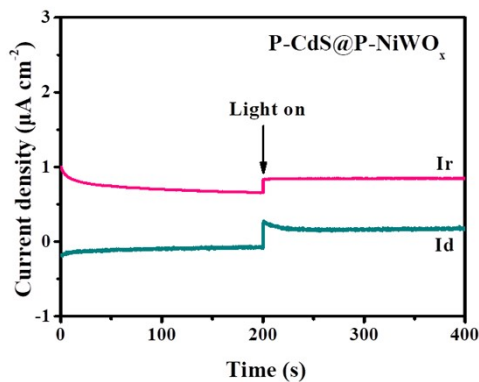

**Fig. S17** DMPO spin trapping EPR technique to measure  $\cdot\text{O}_2^-$  generated photoreaction over P-CdS@P-NiWO<sub>x</sub> under dark or light.

## References

- 1 T. J. R. Weakley and S. A. J. Malik, *Inorg, Nucl. Chem.*, 1967, **29**, 2935.
- 2 F.Xue, Y. T. Si, M. Wang, M. C. Liu and L. J. Guo, *Nano Energy*, 2019, **62**, 823.

3 Y. J. Fu, C. A. Liu, M. L. Zhang, C. Zhu, H. Li, H. B. Wang, Y. X. Song, H. Huang, Y. Liu and Z. H. Kang, *Adv. Energy Mater.*, 2018, 1802525.

4 Y. Xia, X.H. Zhao, C. Xia, Z. Y. Wu, P. Zhu, J. Y. Kim, X. W. Bai, G. H. Gao, Y. F. Hu, J. Zhong, Y. Y. Liu and H. T. Wang, *Nat. Commun.*, 2021, **12**, 4225.
